# Supplementary material for: Breast cancer N Glycosylation dysregulation driven by mutations modulates chemotherapy response and macrophage immunosuppression
Source: Research Square preprint supplement (doi:10.21203/rs.3.rs-6950007/v1), 2025-07-15
Supplement: Supplementary file 1 [file 4a82b3a9fe56335670b5c991.xlsx]

## Sheet: Sheet1
Pathway
Glycolysis/Gluconeogenesis-Homo sapiens (human)
Citrate cycle (TCA cycle)-Homo sapiens (human)
Pentose phosphate pathway-Homo sapiens (human)
Pentose and glucuronate interconversions-Homo sapiens (human)
Fructose and mannose metabolism-Homo sapiens (human)
Galactose metabolism-Homo sapiens (human)
Ascorbate and aldarate metabolism-Homo sapiens (human)
Fatty acid biosynthesis-Homo sapiens (human)
Fatty acid elongation-Homo sapiens (human)
Fatty acid degradation-Homo sapiens (human)
Steroid biosynthesis-Homo sapiens (human)
Primary bile acid biosynthesis-Homo sapiens (human)
Ubiquinone and other terpenoid-quinone biosynthesis-Homo sapiens (human)
Steroid hormone biosynthesis-Homo sapiens (human)
Oxidative phosphorylation-Homo sapiens (human)
Arginine biosynthesis-Homo sapiens (human)
Purine metabolism-Homo sapiens (human)
Caffeine metabolism-Homo sapiens (human)
Pyrimidine metabolism-Homo sapiens (human)
Alanine, aspartate and glutamate metabolism-Homo sapiens (human)
Glycine, serine and threonine metabolism-Homo sapiens (human)
Cysteine and methionine metabolism-Homo sapiens (human)
Valine, leucine and isoleucine degradation-Homo sapiens (human)
Valine, leucine and isoleucine biosynthesis-Homo sapiens (human)
Lysine degradation-Homo sapiens (human)
Arginine and proline metabolism-Homo sapiens (human)
Histidine metabolism-Homo sapiens (human)
Tyrosine metabolism-Homo sapiens (human)
Phenylalanine metabolism-Homo sapiens (human)
Tryptophan metabolism-Homo sapiens (human)
Phenylalanine, tyrosine and tryptophan biosynthesis-Homo sapiens (human)
beta-Alanine metabolism-Homo sapiens (human)
Taurine and hypotaurine metabolism-Homo sapiens (human)
Phosphonate and phosphinate metabolism-Homo sapiens (human)
Selenocompound metabolism-Homo sapiens (human)
D-Amino acid metabolism-Homo sapiens (human)
Glutathione metabolism-Homo sapiens (human)
Starch and sucrose metabolism-Homo sapiens (human)
N-Glycan biosynthesis-Homo sapiens (human)
Other glycan degradation-Homo sapiens (human)
Mucin type O-glycan biosynthesis-Homo sapiens (human)
Various types of N-glycan biosynthesis-Homo sapiens (human)
Other types of O-glycan biosynthesis-Homo sapiens (human)
Mannose type O-glycan biosynthesis-Homo sapiens (human)
Amino sugar and nucleotide sugar metabolism-Homo sapiens (human)
Neomycin, kanamycin and gentamicin biosynthesis-Homo sapiens (human)
Glycosaminoglycan degradation-Homo sapiens (human)
Glycosaminoglycan biosynthesis-chondroitin sulfate/dermatan sulfate-Homo sapiens (human)
Glycosaminoglycan biosynthesis-keratan sulfate-Homo sapiens (human)
Glycosaminoglycan biosynthesis-heparan sulfate/heparin-Homo sapiens (human)
Glycerolipid metabolism-Homo sapiens (human)
Inositol phosphate metabolism-Homo sapiens (human)
Glycosylphosphatidylinositol (GPI)-anchor biosynthesis-Homo sapiens (human)
Glycerophospholipid metabolism-Homo sapiens (human)
Ether lipid metabolism-Homo sapiens (human)
Arachidonic acid metabolism-Homo sapiens (human)
Linoleic acid metabolism-Homo sapiens (human)
alpha-Linolenic acid metabolism-Homo sapiens (human)
Sphingolipid metabolism-Homo sapiens (human)
Glycosphingolipid biosynthesis-lacto and neolacto series-Homo sapiens (human)
Glycosphingolipid biosynthesis-globo and isoglobo series-Homo sapiens (human)
Glycosphingolipid biosynthesis-ganglio series-Homo sapiens (human)
Pyruvate metabolism-Homo sapiens (human)
Glyoxylate and dicarboxylate metabolism-Homo sapiens (human)
Propanoate metabolism-Homo sapiens (human)
Butanoate metabolism-Homo sapiens (human)
One carbon pool by folate-Homo sapiens (human)
Thiamine metabolism-Homo sapiens (human)
Riboflavin metabolism-Homo sapiens (human)
Vitamin B6 metabolism-Homo sapiens (human)
Nicotinate and nicotinamide metabolism-Homo sapiens (human)
Pantothenate and CoA biosynthesis-Homo sapiens (human)
Biotin metabolism-Homo sapiens (human)
Lipoic acid metabolism-Homo sapiens (human)
Folate biosynthesis-Homo sapiens (human)
Retinol metabolism-Homo sapiens (human)
Porphyrin metabolism-Homo sapiens (human)
Terpenoid backbone biosynthesis-Homo sapiens (human)
Nitrogen metabolism-Homo sapiens (human)
Sulfur metabolism-Homo sapiens (human)
Metabolism of xenobiotics by cytochrome P450-Homo sapiens (human)
Drug metabolism-cytochrome P450-Homo sapiens (human)
Drug metabolism-other enzymes-Homo sapiens (human)
